# Supplementary material for: Coseismic fluid–rock interactions at high temperatures in the Chelungpu fault
Source: Springer Nature journal article supplement (doi:10.1038/ngeo308), 2008-09-14
Supplement: 41561_2008_BFngeo308_MOESM587_ESM.pdf [file 41561_2008_BFngeo308_MOESM587_ESM.pdf]

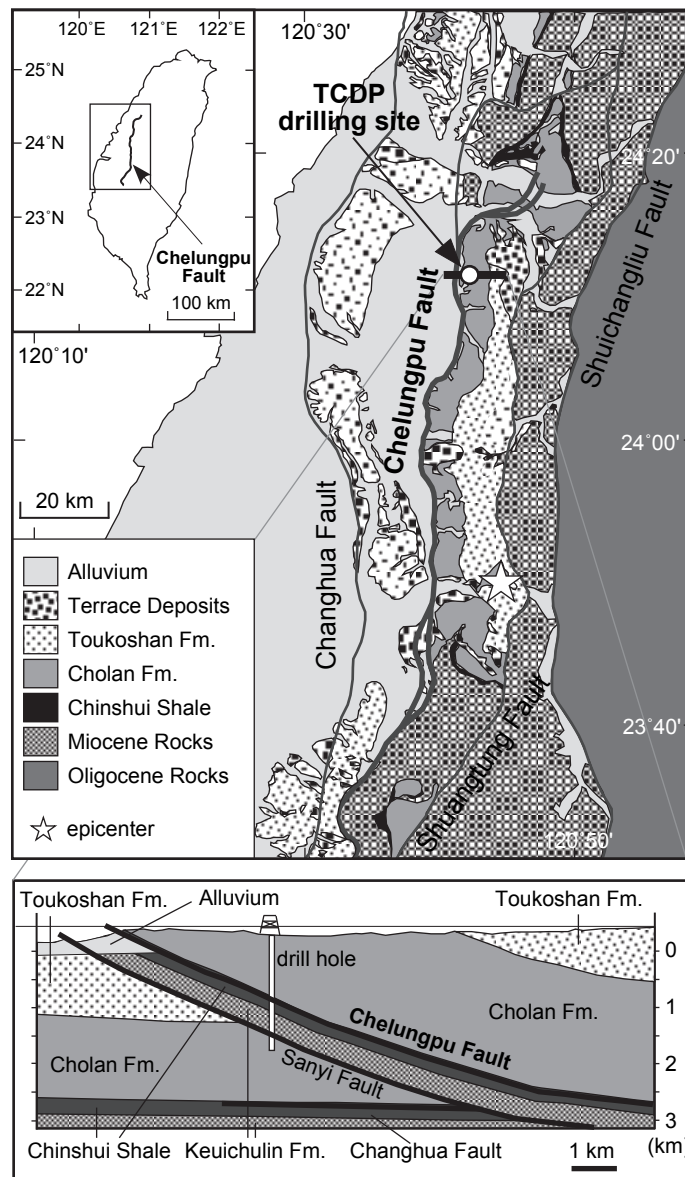

### Supplementary Figure 1.

Geological map of central Taiwan, with the site of the Taiwan Chelungpu-fault Drilling Project (TCDP) and an E-W cross section through the site location<sup>11</sup>. Drilling was carried out near the town of DaKeng in the northern part of the fault system, where a large slip of about 8 m was observed. Two vertical holes, Holes A and B, were drilled about 2 km east of the surface rupture and penetrated the east-dipping Chelungpu fault at about 1.1-1.2 km depth<sup>11,13</sup>. The Chelungpu fault is predominantly developed within and parallel to the bedding of the Pliocene Chinshui shale.

**Supplementary Table 1: Chemical compositions of the TCDP core samples**

| Depth (m)*                                        | FZB1136        |                |                |                |                |                |                |                    |                |                | FZB1194        |                    |                |
|---------------------------------------------------|----------------|----------------|----------------|----------------|----------------|----------------|----------------|--------------------|----------------|----------------|----------------|--------------------|----------------|
|                                                   | 1134.53<br>FDZ | 1135.88<br>BrZ | 1136.22<br>GGZ | 1136.26<br>BGZ | 1136.31<br>BGZ | 1136.35<br>BGZ | 1136.39<br>GGZ | 1136.43<br>GGZ     | 1136.51<br>BrZ | 1136.89<br>FDZ | 1194.68<br>FDZ | 1194.73<br>BGZ(BM) | 1194.75<br>BGZ |
| <i>(wt. %)</i>                                    |                |                |                |                |                |                |                |                    |                |                |                |                    |                |
| SiO <sub>2</sub>                                  | 66.61          | 69.63          | 66.07          | 68.13          | 68.08          | 67.39          | 67.04          | 64.99              | 67.04          | 65.83          | 73.65          | 75.85              | 69.81          |
| TiO <sub>2</sub>                                  | 0.99           | 0.91           | 1.01           | 0.96           | 0.97           | 0.99           | 0.89           | 1.00               | 0.92           | 0.97           | 0.84           | 0.85               | 0.96           |
| Al <sub>2</sub> O <sub>3</sub>                    | 16.17          | 14.66          | 16.67          | 16.13          | 15.79          | 16.32          | 14.79          | 16.98              | 15.34          | 16.24          | 13.16          | 12.47              | 15.32          |
| Fe <sub>2</sub> O <sub>3</sub>                    | 6.91           | 6.09           | 7.19           | 6.53           | 6.83           | 6.67           | 6.41           | 7.12               | 6.73           | 6.95           | 5.18           | 4.51               | 6.01           |
| MnO                                               | 0.09           | 0.09           | 0.10           | 0.02           | 0.02           | 0.03           | 0.14           | 0.11               | 0.11           | 0.08           | 0.05           | 0.01               | 0.04           |
| MgO                                               | 2.41           | 2.11           | 2.50           | 2.37           | 2.52           | 2.58           | 2.30           | 2.63               | 2.45           | 2.71           | 1.77           | 1.66               | 2.11           |
| CaO                                               | 1.78           | 1.70           | 1.29           | 0.49           | 0.66           | 0.82           | 3.63           | 1.90               | 2.51           | 2.04           | 0.88           | 0.45               | 0.78           |
| Na <sub>2</sub> O                                 | 1.49           | 1.53           | 1.53           | 1.94           | 2.03           | 2.01           | 1.65           | 1.54               | 1.54           | 1.50           | 1.56           | 1.72               | 1.65           |
| K <sub>2</sub> O                                  | 3.36           | 3.15           | 3.50           | 3.30           | 2.97           | 3.05           | 3.02           | 3.59               | 3.24           | 3.55           | 2.78           | 2.40               | 3.18           |
| P <sub>2</sub> O <sub>5</sub>                     | 0.18           | 0.13           | 0.14           | 0.12           | 0.13           | 0.15           | 0.13           | 0.14               | 0.13           | 0.13           | 0.12           | 0.09               | 0.13           |
| <i>(ppm)</i>                                      |                |                |                |                |                |                |                |                    |                |                |                |                    |                |
| Li                                                | 50.4           | 50.5           | 62.3           | 24.1           | 25.2           | 24.1           | 44.2           | 66.7               | 65.6           | 66.6           | 48.5           | 21.8               | 42.0           |
| Rb                                                | 116            | 115            | 146            | 126            | 102            | 128            | 120            | 162                | 152            | 155            | 110            | 80.8               | 126            |
| Sr                                                | 123            | 115            | 124            | 169            | 234            | 187            | 166            | 121                | 120            | 129            | 112            | 162                | 133            |
| Cs                                                | 7.61           | 7.73           | 10.9           | 8.01           | 5.93           | 8.37           | 9.40           | 13.1               | 11.9           | 11.7           | 7.11           | 3.13               | 8.35           |
| Ba                                                | 382            | 391            | 410            | 601            | 558            | 516            | 375            | 438                | 438            | 458            | 403            | 443                | 472            |
| La                                                | 32.7           | 36.8           | 37.5           | 37.9           | 37.9           | 39.9           | 32.8           | 35.0               | 33.9           | 37.8           | 33.1           | 36.2               | 38.0           |
| Sm                                                | 5.67           | 6.17           | 6.44           | 6.42           | 6.34           | 6.59           | 5.85           | 5.86               | 5.66           | 6.78           | 5.65           | 6.03               | 6.56           |
| Pb                                                | 21.7           | 21.1           | 21.3           | 21.9           | 22.9           | 20.6           | 19.7           | 23.7               | 22.7           | 26.5           | 20.7           | 24.2               | 25.8           |
| Th                                                | 11.4           | 13.9           | 14.0           | 14.0           | 13.4           | 14.5           | 11.8           | 14.5               | 14.2           | 15.7           | 12.0           | 12.5               | 14.2           |
| <sup>87</sup> Sr/ <sup>86</sup> Sr                | 0.718827       | 0.719275       | 0.719400       | 0.714594       | 0.713243       | 0.713966       | 0.716120       | 0.720527           | 0.720645       | 0.720361       | 0.719070       | 0.714001           | 0.717009       |
| <sup>206</sup> Pb/ <sup>204</sup> Pb              | 18.5405        | 18.6073        | 18.5736        | 18.5589        | 18.5759        | 18.5671        | 18.5899        | 18.6007            | 18.6048        | 18.6185        | 18.4745        | 18.4083            | 18.5468        |
| <sup>207</sup> Pb/ <sup>204</sup> Pb              | 15.6533        | 15.6626        | 15.6570        | 15.6542        | 15.6568        | 15.6543        | 15.6578        | 15.6600            | 15.6603        | 15.6625        | 15.6476        | 15.6409            | 15.6552        |
| <sup>208</sup> Pb/ <sup>204</sup> Pb              | 38.9135        | 39.1837        | 38.9504        | 38.9476        | 38.9639        | 38.9472        | 38.9652        | 38.9354            | 38.9391        | 38.9833        | 38.8902        | 38.8477            | 38.9229        |
| <sup>87</sup> Sr/ <sup>86</sup> Sr <sup>§</sup>   |                | 0.710215       | 0.712223       | 0.711696       | 0.711504       | 0.711305       | 0.711306       | 0.710863           | 0.711583       | 0.711684       | 0.711120       | 0.711318           | 0.712147       |
| <sup>206</sup> Pb/ <sup>204</sup> Pb <sup>§</sup> |                | 18.4752        | 18.5262        | 18.5539        | 18.5512        | 18.5304        | 18.5098        |                    | 18.5064        | 18.5532        | 18.1355        | 18.1448            | 18.3384        |
| <sup>207</sup> Pb/ <sup>204</sup> Pb <sup>§</sup> |                | 15.6503        | 15.6555        | 15.6561        | 15.6569        | 15.6552        | 15.6518        |                    | 15.6562        | 15.6581        | 15.6190        | 15.6171            | 15.6349        |
| <sup>208</sup> Pb/ <sup>204</sup> Pb <sup>§</sup> |                | 38.7404        | 38.8234        | 38.8519        | 38.8502        | 38.8231        | 38.7991        |                    | 38.7696        | 38.8412        | 38.3185        | 38.3415            | 38.5771        |
| Depth (m)*                                        | FZB1194        |                |                |                |                | FZB1243        |                |                    |                |                |                |                    |                |
|                                                   | 1194.78<br>BGZ | 1194.82<br>BGZ | 1194.86<br>BGZ | 1195.11<br>GGZ | 1195.16<br>BrZ | 1243.30<br>FDZ | 1243.34<br>GGZ | 1243.38<br>BGZ(BM) | 1243.41<br>BGZ | 1243.43<br>BGZ | 1243.47<br>BGZ | 1243.51<br>GGZ     | 1243.56<br>GGZ |
| <i>(wt. %)</i>                                    |                |                |                |                |                |                |                |                    |                |                |                |                    |                |
| SiO <sub>2</sub>                                  | 71.13          | 70.75          | 71.43          | 72.65          | 72.13          | 75.00          | 73.50          | 73.73              | 74.06          | 74.14          | 75.00          | 75.96              | 74.74          |
| TiO <sub>2</sub>                                  | 0.93           | 0.94           | 0.89           | 0.86           | 0.90           | 0.78           | 0.83           | 0.90               | 0.88           | 0.84           | 0.80           | 0.74               | 0.76           |
| Al <sub>2</sub> O <sub>3</sub>                    | 14.18          | 14.23          | 13.51          | 13.36          | 13.48          | 11.78          | 12.64          | 13.94              | 13.47          | 12.97          | 12.34          | 11.57              | 12.04          |
| Fe <sub>2</sub> O <sub>3</sub>                    | 5.88           | 5.88           | 5.65           | 5.45           | 5.70           | 4.93           | 5.35           | 4.73               | 4.76           | 4.89           | 4.83           | 4.59               | 4.93           |
| MnO                                               | 0.05           | 0.06           | 0.07           | 0.06           | 0.05           | 0.07           | 0.07           | 0.01               | 0.02           | 0.05           | 0.05           | 0.06               | 0.07           |
| MgO                                               | 2.01           | 2.01           | 1.95           | 1.87           | 1.95           | 1.65           | 1.78           | 1.68               | 1.69           | 1.71           | 1.64           | 1.58               | 1.67           |
| CaO                                               | 1.07           | 1.38           | 1.97           | 1.27           | 1.22           | 1.49           | 1.39           | 0.39               | 0.65           | 1.11           | 1.01           | 1.23               | 1.46           |
| Na <sub>2</sub> O                                 | 1.61           | 1.64           | 1.59           | 1.59           | 1.62           | 1.60           | 1.60           | 1.66               | 1.67           | 1.63           | 1.58           | 1.55               | 1.49           |
| K <sub>2</sub> O                                  | 3.01           | 2.98           | 2.83           | 2.78           | 2.84           | 2.58           | 2.72           | 2.85               | 2.69           | 2.54           | 2.64           | 2.63               | 2.71           |
| P <sub>2</sub> O <sub>5</sub>                     | 0.12           | 0.13           | 0.12           | 0.11           | 0.12           | 0.11           | 0.12           | 0.11               | 0.13           | 0.12           | 0.12           | 0.11               | 0.12           |
| <i>(ppm)</i>                                      |                |                |                |                |                |                |                |                    |                |                |                |                    |                |
| Li                                                | 46.1           | 55.5           | 41.9           | 54.8           | 50.1           | 45.3           | 42.7           | 26.5               | 32.0           | 33.6           | 49.4           | 49.4               | 49.9           |
| Rb                                                | 126            | 135            | 114            | 121            | 116            | 99.2           | 94.6           | 96.1               | 91.9           | 83.5           | 103            | 100                | 101            |
| Sr                                                | 123            | 127            | 117            | 116            | 115            | 120            | 125            | 154                | 137            | 148            | 112            | 122                | 114            |
| Cs                                                | 8.49           | 10.1           | 7.32           | 8.22           | 7.71           | 6.14           | 6.33           | 5.54               | 5.51           | 4.78           | 6.92           | 6.56               | 6.67           |
| Ba                                                | 453            | 416            | 437            | 387            | 399            | 401            | 360            | 400                | 390            | 375            | 384            | 408                | 393            |
| La                                                | 37.5           | 38.3           | 33.9           | 34.5           | 31.3           | 28.7           | 30.0           | 36.7               | 36.1           | 35.5           | 31.8           | 35.2               | 31.0           |
| Sm                                                | 6.45           | 6.81           | 5.91           | 6.10           | 5.60           | 4.98           | 5.20           | 6.63               | 6.20           | 6.09           | 5.49           | 6.08               | 5.37           |
| Pb                                                | 23.9           | 24.7           | 21.8           | 23.0           | 20.9           | 19.4           | 19.7           | 23.2               | 20.3           | 19.7           | 19.1           | 18.4               | 19.0           |
| Th                                                | 13.5           | 14.2           | 12.5           | 12.9           | 11.7           | 10.6           | 11.0           | 13.4               | 13.1           | 12.8           | 16.5           | 12.9               | 11.6           |
| <sup>87</sup> Sr/ <sup>86</sup> Sr                | 0.717810       | 0.718169       | 0.717689       | 0.719108       | 0.719344       | 0.718310       | 0.717226       | 0.714010           | 0.714738       | 0.714400       | 0.718822       | 0.718114           | 0.718171       |
| <sup>206</sup> Pb/ <sup>204</sup> Pb              | 18.5430        | 18.5445        | 18.5388        | 18.5385        | 18.5139        | 18.4906        | 18.5150        | 18.4966            | 18.5068        | 18.5127        | 18.5221        | 18.5084            | 18.4928        |
| <sup>207</sup> Pb/ <sup>204</sup> Pb              | 15.6539        | 15.6539        | 15.6537        | 15.6541        | 15.6518        | 15.6490        | 15.6518        | 15.6507            | 15.6508        | 15.6513        | 15.6528        | 15.6516            | 15.6488        |
| <sup>208</sup> Pb/ <sup>204</sup> Pb              | 38.9360        | 38.9353        | 38.9505        | 38.9099        | 38.9158        | 38.9098        | 38.9732        | 38.9158            | 38.9840        | 38.9816        | 38.9790        | 38.9588            | 38.9169        |
| <sup>87</sup> Sr/ <sup>86</sup> Sr <sup>§</sup>   | 0.712315       |                | 0.712587       | 0.710480       | 0.711122       | 0.710409       | 0.710759       | 0.710549           | 0.710771       |                | 0.710745       | 0.709987           | 0.710910       |
| <sup>206</sup> Pb/ <sup>204</sup> Pb <sup>§</sup> | 17.9959        |                | 17.9181        |                | 18.2740        | 18.1301        | 17.9483        | 18.0418            | 18.0404        | 18.3650        | 18.1386        |                    | 18.2560        |
| <sup>207</sup> Pb/ <sup>204</sup> Pb <sup>§</sup> | 15.6033        |                | 15.5955        |                | 15.6296        | 15.6240        | 15.5990        | 15.6065            | 15.6076        | 15.6392        | 15.6177        |                    | 15.6273        |
| <sup>208</sup> Pb/ <sup>204</sup> Pb <sup>§</sup> | 38.1164        |                | 38.0131        |                | 38.4638        | 38.2359        | 38.0339        | 38.1799            | 38.1785        | 38.6320        | 38.3144        |                    | 38.4695        |

\* Depth for the upper surface of sample.

§ Isotope ratio of H<sub>2</sub>O-soluble component.

## Supplementary Methods

### Calculation of the concentration of a trace element in the gouge after the interaction with fluid

Assuming chemical equilibrium, the solid/fluid bulk distribution coefficient ( $D$ ) of a trace element is defined by

$$D = \frac{C_s}{C_f} \quad (1)$$

where  $C_s$  and  $C_f$  are the element concentrations in the solid (gouge) and fluid, respectively.

Our model 1 assumes interaction of solid with a single batch of fluid. Letting  $R$  to be the fluid/solid-mass ratio, mass balance requires

$$C_s + R \cdot C_f = C_{s0} + R \cdot C_{f0} \quad (2)$$

where  $C_{s0}$  and  $C_{f0}$  are the element concentrations in the solid and fluid, respectively, prior to solid-fluid interaction. From equations (1) and (2), we obtain the equation for calculating the trace element concentration of solid after the interaction with fluid:

$$C_s = D \cdot \frac{C_{s0} + R \cdot C_{f0}}{R + D} \quad (3-1)$$

In model 2, we assume interaction of solid with multiple batches of fluids, each with a small, constant fluid/solid-mass ratio,  $r$ . Each of the batches of fluid, which originally had the element concentration  $C_{f0}$ , is equilibrated with the solid, and then removed from the system. In this case, the element concentration in the solid which interacted with the fluid  $i$  times can be calculated by the following equation:

$$C_{si} = D \cdot \frac{C_{si-1} + r \cdot C_{f0}}{r + D} \quad (3-2)$$

and total  $R$  is given as the sum of the  $r$  values for each of the batches of fluid,  $i \cdot r$ . In this study, we assumed a very small  $r$  value of 0.01.

The model 1 and model 2 represent the both extremes of the mode of solid-fluid interaction, and trace elements with low  $D$  values are more effectively extracted from the solid in model 2 than in model 1 (see Fig. 3).

### Parameters used in the calculations

#### *D values*

Solid/fluid bulk distribution coefficient ( $D$ ) values at 250, 300, and 350°C were

estimated based on two sets of hydrothermal experimental data.

You *et al.*<sup>19</sup> carried out their experiments at 25-350°C and 80 MPa using hemipelagic mudstones from the decollement zone in the Nankai Trough (ODP site 808) and synthetic NaCl-CaCl<sub>2</sub> solutions of composition similar to the in situ pore water (initial water/rock ratio = 3). The sediments they used consisted mainly of quartz, plagioclase, carbonate, illite, smectite, kaolinite, and chlorite, and their total organic carbon content was <0.4%<sup>31</sup>. After the experiments, quartz, plagioclase, illite (including celadonite), chlorite (clinocllore), and possibly maghemite were identified in the residual solids.

James *et al.*<sup>20</sup> carried out similar experiments at 50-350°C and 40 MPa using hemipelagic sediments from the Escanaba Trough (ODP site 1037) and synthetic solutions with fluid composition comparable to the fluids thought to recharge sediment- and basalt-dominated hydrothermal systems at mid-ocean ridges (initial water/rock ratio = 4). The sediments they used consisted of 29% quartz, 24% feldspars (20% plagioclase, 4% K-feldspar), 6% clay minerals (illite and chlorite), 5% heavy minerals, and 34% lithic fragments of largely volcanic origin. The total inorganic and total organic carbon contents were as low as 0.4% and 0.6%, respectively.

In these experiments, the solution samples for chemical analysis were intermittently extracted from the reaction cell at controlled pressure and temperature during heating and cooling episodes. The empirical *D* value at each temperature can be estimated as

$$D = \frac{C_{s \text{ exp}}}{C_{f \text{ exp}}} = \frac{m_{s0 \text{ exp}} C_{s0 \text{ exp}} + m_{f0 \text{ exp}} C_{f0 \text{ exp}} - m_{f \text{ exp}} C_{f \text{ exp}}}{m_{s \text{ exp}} C_{f \text{ exp}}} \quad (4)$$

where  $m_{s0 \text{ exp}}$ ,  $m_{f0 \text{ exp}}$ ,  $m_{s \text{ exp}}$  and  $m_{f \text{ exp}}$  are the masses of the starting sediment, starting fluid, reacted sediment, and reacted fluid, respectively, and  $C_{s0 \text{ exp}}$ ,  $C_{f0 \text{ exp}}$ ,  $C_{s \text{ exp}}$  and  $C_{f \text{ exp}}$  are the element concentrations in the starting sediment, starting fluid, reacted sediment, and reacted fluid, respectively. The *D* values were calculated using the experimental data from the heating episode by assuming  $m_{s \text{ exp}} = m_{s0 \text{ exp}}$ , and corrected for the loss of fluid and elements due to repeated extraction of the sample solution.

In both experiments, temperature was increased step wise to 350°C in increment of 25-50°C. Total holding times at 250, 300, and 350°C were 72 hours for all temperatures in the experiment by You *et al.*<sup>19</sup> and 99, 119 and 47 hours, respectively, in the experiment by James *et al.*<sup>20</sup>. In the latter experiment at 250°C, the compositions of two fluid samples recovered after holding times of 48 hours and 99 hours were within analytical error, suggesting that near steady-state conditions were attained. You and Gieskes<sup>32</sup> performed another experiment using the same conditions as You *et al.*<sup>19</sup>, but they added <sup>6</sup>Li- and <sup>18</sup>O-enriched spikes to the starting solution. Despite the contrasting Li contents in the starting solutions (0 μM and 8400 μM), at 350°C these

two experiments yielded nearly identical  $D_{Li}$  values (1.2 and 1.3) and  $D_{Sr}$  values (24 and 27), which is consistent with the attainment of trace element equilibrium between the fluid and the sediment.

It has been suggested that organic materials in sediment may affect the mobility of alkaline and alkali earth metals<sup>33</sup>. Although organic carbon content (at <0.6 %) was low in the TCDP sediments and in the sediments used by You *et al.*<sup>19</sup> and James *et al.*<sup>20</sup>, and therefore unlikely to control the mobility of elements investigated here, the effect of the organic materials can be evaluated on the basis of the data of a hydrothermal experiment by Thornton and Seyfried<sup>34</sup>. They carried out their experiments at 350°C and 50 MPa for a total holding time of 2639 hours, using a diatomaceous ooze (a nearly equal mixture of pelagic clay and biogenic silica) from the Guaymas Basin and original sediment pore fluid (initial water/rock ratio = 3). The sediment they used consisted of biogenic silica, quartz, K-feldspar, plagioclase, and minor amounts of smectite and barite, and contained 3.99% total organic carbon. The  $D_{Sr}$  and  $D_{Ba}$  values estimated from their experiment were 24 and 9.4, respectively, and are comparable to those estimated from the data of You *et al.*<sup>19</sup> ( $D_{Sr} = 24$  and  $D_{Ba} = 13$ ) and James *et al.*<sup>20</sup> ( $D_{Sr} = 20$  and  $D_{Ba} = 15$ ). Unfortunately, Li and Rb contents of initial sediment are not available in the data of Thornton and Seyfried<sup>34</sup>. However, a Li/Rb ratio of 1.9 observed for the sample solution at 350°C, which is likely to be controlled by equilibrium between clay minerals and fluid, is comparable to the value of 2.4 observed by You *et al.*<sup>19</sup> and James *et al.*<sup>20</sup>. Thus, it is conceivable that our estimates of  $D$  were not affected by the presence of organic materials in the sediment.

Because La, Sm and Pb data are not available in James *et al.*<sup>20</sup>, the  $D_{La}$ ,  $D_{Sm}$  and  $D_{Pb}$  values estimated on the basis of experimental results of You *et al.*<sup>19</sup> were used for both calculations shown in Fig 2.

### **$C_{s0}$ and $C_{f0}$ values**

The initial gouge concentrations ( $C_{s0}$ ) we used were the same as the reference values for FZB1136 used in Fig. 2, that is, the averages of the sample data from 1136.22 and 1136.51 m. The initial fluid concentration ( $C_{f0}$ ) values for Li, Rb, Sr, Cs and Ba were estimated from the compositions of pore waters of 49-67°C ( $n = 8$ ) collected from neritic sediment in the High Island Field, offshore Texas, at depths of about 1800-2100m<sup>22</sup>. Concentrations of these elements in the pore waters correlate well with Na contents, and we used the values at a Na concentration of 11 000 ppm for  $C_{f0}$ . For La, Sm, and Pb, the  $C_{f0}$  values were taken from the fluid compositions obtained by hydrothermal experiments at 25 and 63°C<sup>19</sup>. The  $^{87}Sr/^{86}Sr$  and  $^{206}Pb/^{204}Pb$  ratios of initial gouge and initial fluid we used were the average values of the samples from 1136.22 and 1136.51 m and the lowest values of the H<sub>2</sub>O-soluble components in

FZB1136 (the 1135.88m sample), respectively.

|                                   | <i>D</i> (You <i>et al.</i> ) |       |        | <i>D</i> (James <i>et al.</i> ) |       |       | $C_{s0}$<br>(ppm) | $C_{f0}$<br>(ppm) |
|-----------------------------------|-------------------------------|-------|--------|---------------------------------|-------|-------|-------------------|-------------------|
|                                   | 250°C                         | 300°C | 350°C  | 250°C                           | 300°C | 350°C |                   |                   |
| Li                                | 11                            | 3.7   | 1.2    | 15                              | 8.4   | 2.8   | 63.9              | 0.44              |
| Rb                                | 290                           | 120   | 13     | 81                              | 67    | 25    | 149               | 0.085             |
| Sr                                | 17                            | 24    | 24     | 16                              | 17    | 20    | 122               | 21                |
| Cs                                | 80                            | 42    | 9.1    | 92                              | 60    | 26    | 11.4              | 0.024             |
| Ba                                | 17                            | 54    | 13     | 20                              | 17    | 14    | 424               | 30                |
| La                                | 41000                         | 47000 | 26000  |                                 |       |       | 35.7              | 0.0002            |
| Sm*                               | 41000                         | 47000 | 26000  |                                 |       |       | 6.05              | 0.0002            |
| Pb                                | 1900                          | 350   | 110000 |                                 |       |       | 22.0              | 0.005             |
|                                   |                               |       |        |                                 |       |       | Initial gouge     | Initial fluid     |
| $^{87}\text{Sr}/^{86}\text{Sr}$   |                               |       |        |                                 |       |       | 0.72002           | 0.7102            |
| $^{206}\text{Pb}/^{204}\text{Pb}$ |                               |       |        |                                 |       |       | 18.589            | 18.48             |

\**D* and  $C_{f0}$  of Sm were assumed to be the same as those of La.

#### Supplementary references

31. Berner, U. & Koch, J. in *Proceedings of the Ocean Drilling Program, Scientific Results, Vol. 131* (eds., Hill, I. A., Taira, A., Firth, J. V., *et al.*) 379-385 (Ocean Drilling Program, College Station, Texas, 1993).
32. You, C.-F. & Gieskes, J. M. Hydrothermal alteration of hemi-pelagic sediments: experimental evaluation of geochemical process in shallow subduction zones. *Appl. Geochem.* **16**, 1055-1066 (2001).
33. Clauer, N., Chaudhuri, S., Lewan, M. D. & Toulkeridis, T. Effect of thermal maturation on the K–Ar, Rb–Sr and REE systematics of an organic-rich New Albany Shale as determined by hydrous pyrolysis. *Chem. Geol.* **234**, 169-177 (2006).
34. Thornton, E. & Seyfried, W. E., Jr. Reactivity of organic-rich sediment in seawater at 350°C, 500 bars: experimental and theoretical constraints and implications for the Guaymas Basin hydrothermal system. *Geochim. Cosmochim. Acta* **51**, 1997-2010 (1987).
